# Supplementary material for: Identification of effector candidate genes of Rhizoctonia solani AG-1 IA expressed during infection in Brachypodium distachyon
Source: PubMed Central journal article supplement (PMC7483729; doi:10.1038/s41598-020-71968-x), 2020-09-10
Supplement: 41598_2020_71968_MOESM2_ESM.pdf [file 41598_2020_71968_MOESM2_ESM.pdf]

## Supplementary Information

### Identification of effector candidate genes of *Rhizoctonia solani* expressed during infection on *Brachypodium distachyon*

Sobhy S. H. Abdelsalam<sup>1,2</sup>, Yusuke Kouzai<sup>3,4</sup>, Megumi Watanabe<sup>1</sup>, Komaki Inoue<sup>3</sup>, Hidenori Matsui<sup>1</sup>, Mikihiro Yamamoto<sup>1</sup>, Yuki Ichinose<sup>1</sup>, Kazuhiro Toyoda<sup>1</sup>, Seiji Tsuge<sup>5</sup>, Keiichi Mochida<sup>3,4,6</sup>, and Yoshiteru Noutoshi<sup>1\*</sup>

\*Corresponding author, Yoshiteru Noutoshi (noutoshi@okayama-u.ac.jp)

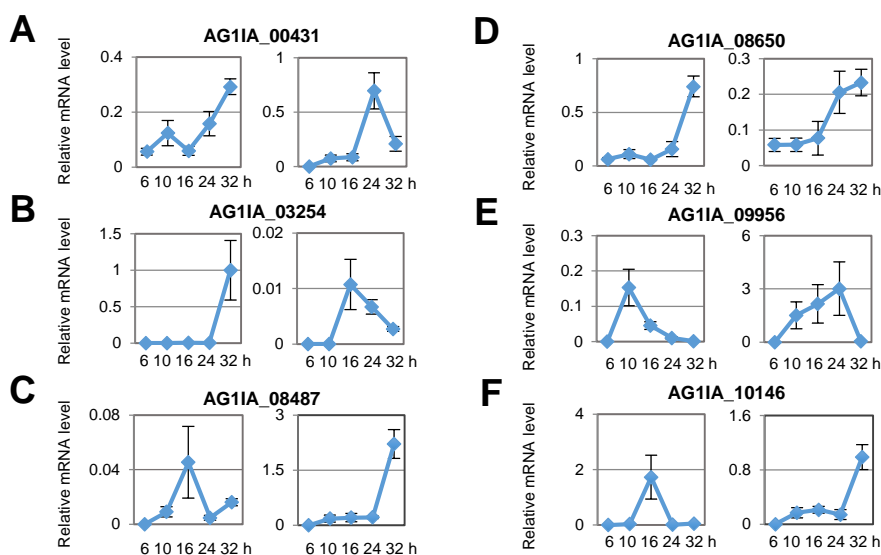

**Supplementary Figure S1.** Expression profiles of *RsSEPGs* during inoculation of *Rhizoctonia solani* on detached leaves of *Brachypodium distachyon* which showed different expression patterns in two independent experiments. (A to F) Expressions of *AGIA\_00431* (cluster 4 or 6) (A), *AGIIA\_03254* (cluster 6 or 3) (B), *AGIIA\_08487* (cluster 3 or 6) (C), *AGIIA\_08650* (cluster 6 or 5) (D), *AGIIA\_09956* (cluster 2 or 3) (E), and *AGIIA\_10146* (cluster 3 or 6) (F) of *R. solani*, which were classified into different clusters with their expression patterns, on *B. distachyon* at 6, 10, 16, 24, and 32 hours post inoculation with the improved method. Gene expressions were examined using qRT-PCR using cDNA prepared with total RNAs extracted from *R. solani*-inoculated *B. distachyon* leaves at each time point. Graphs display the relative mRNA level of each gene normalized by *18S rRNA* as internal control. The data are presented as means with standard error of 4 biological replicates. The results of two independent experiments were shown.

**Supplementary Table S1.** Summary of RNA-seq data of *Rhizoctonia solani* growing on PDA medium, and *R. solani* in detached leaves of *Brachypodium distachyon* Bd21

| Sample name                            | Biological replicate | Mapping results to the <i>B. distachyon</i> genome |                        |            |                     |                          | Mapping results to the <i>R. solani</i> genome |                        |            |                                 |                     |
|----------------------------------------|----------------------|----------------------------------------------------|------------------------|------------|---------------------|--------------------------|------------------------------------------------|------------------------|------------|---------------------------------|---------------------|
|                                        |                      | Number of total reads                              | Number of mapped reads | Mapped (%) | Properly paired (%) | Number of unmapped reads | Number of total reads                          | Number of mapped reads | Mapped (%) | Number of properly paired reads | Properly paired (%) |
| On PDA medium                          | 1                    |                                                    |                        |            |                     |                          | 75,820,544                                     | 62,663,857             | 82.65      | 52,149,370                      | 68.78               |
|                                        | 2                    |                                                    |                        |            |                     |                          | 71,975,102                                     | 59,730,523             | 82.99      | 48,662,366                      | 67.61               |
|                                        | 3                    |                                                    |                        |            |                     |                          | 74,022,804                                     | 60,630,695             | 81.91      | 50,261,484                      | 67.90               |
| In <i>B. distachyon</i> leaves (8 hpi) | 1                    | 51,894,736                                         | 48,761,392             | 93.96      | 85.98               | 3,133,344                | 1,812,936                                      | 36,066                 | 1.989      | 30,258                          | 1.669               |
|                                        | 2                    | 64,192,412                                         | 60,122,908             | 93.66      | 85.26               | 4,069,504                | 2,480,250                                      | 13,589                 | 0.548      | 11,340                          | 0.457               |
|                                        | 3                    | 60,687,308                                         | 56,567,307             | 93.21      | 83                  | 4,120,001                | 2,586,980                                      | 11,334                 | 0.438      | 9,098                           | 0.352               |

**Supplementary Table S3. *Rhizoctonia solani* AG1IA secretory effector protein genes (*RsSEPGs*) with their expressions during infection and agar medium**

| GeneID <sup>a</sup>             | Correction of gene model | Loss of signal peptide after annotation calibration | Length (aa) | Cluster <sup>b</sup> | Expression timing in Zheng et al (2013) <sup>c</sup> | Detection of transcripts in Xia et al (2017) | Annotation <sup>d</sup>                                             | Expression levels on PDA medium (FPKM) <sup>e</sup> |         |         |         |
|---------------------------------|--------------------------|-----------------------------------------------------|-------------|----------------------|------------------------------------------------------|----------------------------------------------|---------------------------------------------------------------------|-----------------------------------------------------|---------|---------|---------|
|                                 |                          |                                                     |             |                      |                                                      |                                              |                                                                     | Rep1                                                | Rep2    | Rep3    | AVG     |
| AG1IA_00153                     | yes                      | yes                                                 | 183>        | n.a.                 | 24 hpi                                               |                                              | hypothetical protein                                                | 12.11                                               | 23.17   | 22.26   | 19.18   |
| <b>AG1IA_00157</b>              | yes                      | no                                                  | 168         | 2                    | 24 hpi                                               |                                              | polysaccharide deacetylase domain-containing protein                | 4.51                                                | 7.52    | 9.41    | 7.15    |
| AG1IA_00172 <sup>f</sup>        | n.a.                     | n.a.                                                | -           | n.a.                 | n.a.                                                 |                                              | Cysteine proteinase                                                 | 12.46                                               | 18.47   | 22.04   | 17.66   |
| <b>AG1IA_00273</b>              | yes                      | no                                                  | 146         | 5                    | 10, 18 hpi                                           | yes                                          | hypothetical protein                                                | 92.34                                               | 48.50   | 32.69   | 57.84   |
| <b>AG1IA_00431</b>              | no                       | no                                                  | 232         | 4 or 6               | n.a.                                                 |                                              | GILT domain-containing protein                                      | 215.43                                              | 168.17  | 173.44  | 185.68  |
| <b>AG1IA_00478</b>              | yes                      | no                                                  | 90          | 2                    | n.a.                                                 |                                              | hypothetical protein                                                | 20.93                                               | 25.13   | 26.58   | 24.21   |
| AG1IA_00529                     | yes                      | yes                                                 | 160         | n.a.                 | n.a.                                                 |                                              | hypothetical protein                                                | 8.07                                                | 6.39    | 7.29    | 7.25    |
| <b>AG1IA_00669</b> <sup>h</sup> | yes                      | no                                                  | 294>        | 4                    | 10 hpi                                               |                                              | glycosyl hydrolase family 61 domain-containing protein              | 91.92                                               | 140.04  | 126.43  | 119.47  |
| <b>AG1IA_00684</b>              | yes                      | no                                                  | 67          | 6                    | 10, 18 hpi                                           |                                              | hypothetical protein                                                | 0.27                                                | 0.71    | 0.69    | 0.55    |
| <b>AG1IA_00763</b>              | n.a.                     | n.a.                                                | 68          | n.d.                 | 24 hpi                                               |                                              | hypothetical protein                                                | 1.30                                                | 0.00    | 0.00    | 0.43    |
| <b>AG1IA_00879</b>              | n.a.                     | n.a.                                                | 156         | n.d.                 | 10 hpi                                               |                                              | hypothetical protein                                                | 6.56                                                | 8.45    | 7.23    | 7.41    |
| <b>AG1IA_00951</b>              | yes                      | no                                                  | 134         | 6                    | n.a.                                                 |                                              | deuterolysin metalloprotease (M35) family domain-containing protein | 3107.04                                             | 2100.49 | 1561.70 | 2256.41 |
| <b>AG1IA_01042</b>              | yes                      | no                                                  | 170         | 2                    | n.a.                                                 | yes                                          | hypothetical protein                                                | 13.98                                               | 8.07    | 9.42    | 10.49   |
| <b>AG1IA_01512</b>              | yes                      | no                                                  | 78          | 4                    | n.a.                                                 | yes                                          | hypothetical protein                                                | 19.66                                               | 17.26   | 16.02   | 17.65   |
| AG1IA_01599                     | yes                      | yes                                                 | 391         | n.a.                 | n.a.                                                 |                                              | lipoic acid synthase                                                | 86.49                                               | 86.45   | 91.46   | 88.13   |
| <b>AG1IA_01603</b>              | yes                      | no                                                  | 85          | 2                    | n.a.                                                 |                                              | DUF1524 domain containing-protein                                   | 10.51                                               | 14.77   | 14.81   | 13.36   |
| <b>AG1IA_01604</b>              | yes                      | no                                                  | 211         | 2                    | n.a.                                                 | yes                                          | DUF1524 domain containing-protein                                   | 15.46                                               | 18.00   | 14.69   | 16.05   |
| <b>AG1IA_01605</b>              | no                       | no                                                  | 56          | 2                    | n.a.                                                 |                                              | hypothetical protein                                                | 148.22                                              | 164.07  | 160.04  | 157.44  |
| <b>AG1IA_01933</b>              | n,a,                     | n.a.                                                | 88          | 4                    | n.a.                                                 |                                              | hypothetical protein                                                | 0.91                                                | 2.65    | 2.15    | 1.90    |
| AG1IA_02138                     | yes                      | yes                                                 | 290>        | n.a.                 | n.a.                                                 |                                              | hypothetical protein                                                | 58.78                                               | 74.98   | 67.94   | 67.23   |
| AG1IA_02490 <sup>f</sup>        | n.a.                     | n.a.                                                | -           | n.a.                 | n.a.                                                 |                                              | hypothetical protein                                                | 0.59                                                | 0.00    | 0.00    | 0.20    |
| AG1IA_02878/79/80 <sup>g</sup>  | yes                      | yes                                                 | 759         | n.a.                 | 24 hpi                                               |                                              | DNA binding domain-containing protein                               | 35.98                                               | 47.58   | 45.14   | 42.90   |
| <b>AG1IA_02940</b>              | yes                      | no                                                  | 209         | 6                    | n.a.                                                 |                                              | DUF3455 domain containing-protein                                   | 430.26                                              | 251.35  | 207.44  | 296.35  |
| <b>AG1IA_03047</b>              | n.a.                     | n.a.                                                | 68          | 5                    | n.a.                                                 |                                              | hypothetical protein                                                | 1.30                                                | 0.73    | 0.00    | 0.67    |
| <b>AG1IA_03254</b>              | no                       | no                                                  | 111         | 3 or 6               | 10 hpi                                               |                                              | hypothetical protein                                                | 9.03                                                | 12.85   | 14.38   | 12.09   |
| <b>AG1IA_04006</b>              | no                       | no                                                  | 54          | 2                    | n.a.                                                 |                                              | hypothetical protein                                                | 8.63                                                | 21.74   | 13.00   | 14.46   |
| AG1IA_04108                     | yes                      | yes                                                 | 52          | n.a.                 | 24 hpi                                               |                                              | hypothetical protein                                                | 2.12                                                | 4.91    | 6.18    | 4.40    |
| AG1IA_04191                     | yes                      | yes                                                 | 98          | n.a.                 | 10 hpi                                               |                                              | hypothetical protein                                                | 0.62                                                | 1.00    | 0.16    | 0.59    |
| <b>AG1IA_04237</b>              | yes                      | no                                                  | 138         | 5                    | 24 hpi                                               |                                              | hypothetical protein                                                | 0.49                                                | 0.52    | 0.12    | 0.38    |

|                                |      |      |      |        |            |     |                                                                         |        |        |        |        |
|--------------------------------|------|------|------|--------|------------|-----|-------------------------------------------------------------------------|--------|--------|--------|--------|
| AG11A_04267/8 <sup>g</sup>     | yes  | yes  | 478  | n.a.   | n.a.       |     | Viral tegment protein/pectinesterase inhibitor                          | 53.65  | 55.73  | 54.81  | 54.73  |
| <b>AG11A_04298</b>             | yes  | no   | 218  | 4      | n.a.       |     | emp24/gp25L/p24 family/GOLD domain-containing protein                   | 66.30  | 64.66  | 71.39  | 67.45  |
| <b>AG11A_04737</b>             | n.a. | n.a. | 140  | n.d.   | n.a.       |     | hypothetical protein                                                    | 0.00   | 0.00   | 0.00   | 0.00   |
| <b>AG11A_04814</b>             | n.a. | n.a. | 145  | n.d.   | 10 hpi     |     | hypothetical protein                                                    | 0.22   | 0.36   | 0.23   | 0.27   |
| <b>AG11A_04819</b>             | no   | no   | 151  | 5      | n.a.       |     | fungus cellulose binding domain-containing protein                      | 0.00   | 0.00   | 0.00   | 0.00   |
| AG11A_04889 <sup>f</sup>       | n.a. | n.a. | -    | n.a.   | n.a.       |     | hypothetical protein                                                    | 0.00   | 0.00   | 0.00   | 0.00   |
| AG11A_05179                    | yes  | yes  | 60   | n.a.   | n.a.       | yes | hypothetical protein                                                    | 0.13   | 0.29   | 0.00   | 0.14   |
| <b>AG11A_05291</b>             | no   | no   | 230  | 3      | 24 hpi     | yes | hypothetical protein                                                    | 35.87  | 41.33  | 33.47  | 36.89  |
| <b>AG11A_05500</b>             | yes  | no   | 227> | 2      | n.a.       |     | hypothetical protein                                                    | 780.36 | 928.89 | 845.63 | 851.63 |
| AG11A_05601 <sup>f</sup>       | n.a. | n.a. | -    | n.a.   | 24 hpi     |     | histone acetyl transferase                                              | 15.28  | 11.79  | 19.81  | 15.63  |
| <b>AG11A_05783</b>             | no   | no   | 90   | 5      | n.a.       |     | hypothetical protein                                                    | 27.82  | 56.66  | 58.08  | 47.52  |
| <b>AG11A_05938</b>             | yes  | no   | 189  | 1      | n.a.       |     | hypothetical protein                                                    | 28.44  | 78.85  | 63.30  | 56.86  |
| <b>AG11A_06169</b>             | n.a. | n.a. | 184  | n.d.   | 24 hpi     |     | hypothetical protein                                                    | 0.00   | 0.00   | 0.00   | 0.00   |
| <b>AG11A_06325</b>             | no   | no   | 142  | 2      | n.a.       | yes | FKBP-type peptidyl-prolyl cis-trans isomerase domain-containing protein | 149.73 | 212.66 | 194.36 | 185.58 |
| <b>AG11A_06613<sup>h</sup></b> | yes  | no   | 218  | 2      | n.a.       | yes | DUF3129 domain containing-protein                                       | 183.12 | 312.28 | 273.76 | 256.39 |
| <b>AG11A_06710<sup>h</sup></b> | yes  | no   | 38   | 6      | n.a.       |     | hypothetical protein                                                    | 0.00   | 0.63   | 0.40   | 0.34   |
| <b>AG11A_06739</b>             | yes  | no   | 221  | 4      | 18, 24 hpi |     | hypothetical protein                                                    | 9.26   | 7.92   | 9.28   | 8.82   |
| AG11A_06741                    | yes  | yes  | 59   | n.a.   | 18, 24 hpi |     | hypothetical protein                                                    | 1.26   | 0.00   | 1.68   | 0.98   |
| <b>AG11A_07047</b>             | yes  | no   | 154  | 6      | 24 hpi     |     | hypothetical protein                                                    | 31.69  | 30.05  | 25.03  | 28.92  |
| <b>AG11A_07075</b>             | yes  | no   | 117  | 5      | n.a.       | yes | CFEM domain-containing protein                                          | 1.57   | 4.68   | 3.22   | 3.15   |
| <b>AG11A_07122</b>             | n.a. | n.a. | 133  | 5      | n.a.       |     | hypothetical protein                                                    | 0.00   | 0.00   | 0.00   | 0.00   |
| <b>AG11A_07262</b>             | n.a. | n.a. | 257  | n.d.   | n.a.       | yes | hypothetical protein                                                    | 0.25   | 0.10   | 0.20   | 0.18   |
| <b>AG11A_07267<sup>h</sup></b> | yes  | no   | 159  | 1      | n.a.       | yes | hypothetical protein                                                    | 5.80   | 6.46   | 8.31   | 6.86   |
| AG11A_07490                    | yes  | yes  | 129  | n.a.   | n.a.       |     | Yippee domain-containing protein                                        | 10.59  | 10.34  | 12.10  | 11.01  |
| <b>AG11A_07958<sup>h</sup></b> | yes  | no   | 306  | 4      | 18, 24 hpi |     | igA peptidase M64 domain-containing protein                             | 13.85  | 10.61  | 12.07  | 12.18  |
| <b>AG11A_07966</b>             | yes  | no   | 142  | 1      | 10 hpi     |     | hypothetical protein                                                    | 8.19   | 9.09   | 9.30   | 8.86   |
| <b>AG11A_08025</b>             | no   | no   | 238  | 2      | n.a.       |     | DUF3421 domain containing-protein                                       | 38.43  | 44.08  | 37.76  | 40.09  |
| <b>AG11A_08061</b>             | n.a. | n.a. | 184  | 5      | 10, 18 hpi |     | hypothetical protein                                                    | 0.23   | 0.57   | 0.08   | 0.30   |
| <b>AG11A_08487<sup>h</sup></b> | yes  | no   | 144  | 3 or 6 | 24 hpi     |     | Ribonuclease domain-containing protein                                  | 384.71 | 416.22 | 430.21 | 410.38 |
| <b>AG11A_08488</b>             | yes  | no   | 149  | 2      | 24 hpi     | yes | Ribonuclease domain-containing protein                                  | 2.28   | 3.45   | 0.98   | 2.24   |
| <b>AG11A_08577</b>             | n.a. | n.a. | 49   | n.d.   | n.a.       |     | hypothetical protein                                                    | 0.00   | 0.00   | 0.00   | 0.00   |
| <b>AG11A_08615</b>             | yes  | no   | 225  | 1      | 10 hpi     | yes | hypothetical protein                                                    | 24.78  | 25.15  | 25.99  | 25.31  |
| <b>AG11A_08650</b>             | yes  | no   | 213> | 5 or 6 | 24 hpi     |     | hypothetical protein                                                    | 23.90  | 58.04  | 48.62  | 43.52  |
| <b>AG11A_08777</b>             | yes  | no   | 160  | 6      | 24 hpi     |     | plastocyanin-like domain-containing protein                             | 0.48   | 0.72   | 0.77   | 0.65   |
| AG11A_08781 <sup>f</sup>       | n.a. | n.a. | -    | n.a.   | 18, 24 hpi |     | Cuticle-degrading protease                                              | 61.13  | 42.02  | 19.48  | 40.87  |

|                          |      |      |                     |        |            |     |                        |        |        |        |        |
|--------------------------|------|------|---------------------|--------|------------|-----|------------------------|--------|--------|--------|--------|
| AG11A_08891              | yes  | yes  | 147                 | n.a.   | n.a.       | yes | hypothetical protein   | 59.57  | 47.90  | 41.50  | 49.65  |
| AG11A_08892              | yes  | yes  | 169                 | n.a.   | n.a.       | yes | hypothetical protein   | 63.82  | 47.94  | 45.15  | 52.30  |
| AG11A_08957              | yes  | yes  | 32                  | n.a.   | n.a.       |     | hypothetical protein   | 0.00   | 0.00   | 0.00   | 0.00   |
| <b>AG11A_09055</b>       | yes  | no   | 265                 | 5      | n.a.       | yes | thaumatin-like protein | 2.67   | 2.82   | 2.26   | 2.58   |
| <b>AG11A_09060</b>       | yes  | no   | 253                 | 4      | n.a.       | yes | thaumatin-like protein | 5.50   | 6.78   | 5.84   | 6.04   |
| AG11A_09137 <sup>f</sup> | n.a. | n.a. | -                   | n.a.   | n.a.       |     | hypothetical protein   | 5.06   | 2.22   | 3.63   | 3.64   |
| <b>AG11A_09202</b>       | yes  | no   | 184                 | 2      | n.a.       | yes | hypothetical protein   | 106.32 | 205.36 | 185.35 | 165.68 |
| <b>AG11A_09203</b>       | yes  | no   | 181                 | 2      | n.a.       | yes | hypothetical protein   | 38.83  | 52.21  | 43.66  | 44.90  |
| <b>AG11A_09207</b>       | yes  | no   | 182                 | 1      | 24 hpi     | yes | hypothetical protein   | 316.59 | 322.34 | 235.00 | 291.31 |
| <b>AG11A_09229</b>       | yes  | no   | 99                  | 4      | n.a.       |     | hypothetical protein   | 2.50   | 1.32   | 1.04   | 1.62   |
| AG11A_09275              | yes  | yes  | 158                 | n.a.   | n.a.       |     | hypothetical protein   | 521.10 | 414.59 | 355.22 | 430.30 |
| <b>AG11A_09643</b>       | n.a. | n.a. | 66                  | n.d.   | n.a.       |     | hypothetical protein   | 0.00   | 0.00   | 0.00   | 0.00   |
| <b>AG11A_09728</b>       | yes  | no   | 67                  | 5      | n.a.       |     | hypothetical protein   | 1.24   | 1.54   | 0.74   | 1.18   |
| AG11A_09836              | yes  | yes  | 147                 | n.a.   | 18 hpi     |     | hypothetical protein   | 47.64  | 41.95  | 36.13  | 41.91  |
| <b>AG11A_09837</b>       | n.a. | n.a. | 131                 | n.d.   | 10 hpi     |     | hypothetical protein   | 0.00   | 0.00   | 0.00   | 0.00   |
| <b>AG11A_09956</b>       | no   | no   | 84                  | 3 or 4 | n.a.       | yes | hypothetical protein   | 173.67 | 148.51 | 123.75 | 148.64 |
| <b>AG11A_10146</b>       | yes  | no   | 82                  | 4 or 6 | n.a.       |     | hypothetical protein   | 38.00  | 98.71  | 86.25  | 74.32  |
| AG11A_10180              | yes  | yes  | 146                 | n.a.   | n.a.       |     | hypothetical protein   | 2.23   | 2.63   | 3.06   | 2.64   |
| <b>AG11A_10284</b>       | yes  | no   | 80 <sup>&gt;</sup>  | 1      | n.a.       |     | hypothetical protein   | 0.00   | 0.00   | 0.00   | 0.00   |
| AG11A_10296 <sup>f</sup> | n.a. | n.a. | -                   | n.a.   | 10 hpi     |     | hypothetical protein   | 24.79  | 20.71  | 24.11  | 23.20  |
| AG11A_10375              | yes  | yes  | 168 <sup>&gt;</sup> | n.a.   | n.a.       |     | valine-tRNA ligase     | 72.02  | 72.31  | 64.21  | 69.52  |
| AG11A_10403              | yes  | yes  | 152 <sup>&gt;</sup> | n.a.   | n.a.       |     | hypothetical protein   | 9.10   | 8.83   | 12.65  | 10.19  |
| AG11A_10405              | yes  | yes  | 65 <sup>&gt;</sup>  | n.a.   | 18, 24 hpi | yes | hypothetical protein   | 0.40   | 0.45   | 0.81   | 0.55   |
| <b>AG11A_10478</b>       | no   | no   | 93                  | 5      | n.a.       |     | hypothetical protein   | 12.03  | 14.08  | 17.09  | 14.40  |

<sup>a</sup> Finally selected *RsSEPGs* after verification of gene model were shown in bold letter.

<sup>b</sup> Cluster numbers categorized with their expression profiles during infection on *Brachypodium distachyon* in this study as shown in Fig. 2.

<sup>c</sup> Expression timing (hours) after inoculation on rice plants determined by Zheng et al. (2013).

<sup>d</sup> Annotations were obtained from top hit of blastP search.

<sup>e</sup> FPKM (fragments per kilobase of exon per million reads mapped) of 3 independent RNA-seq analysis using total RNA prepared from growing hyphae of *R. solani*.

<sup>f</sup> Transcripts were detected in reverse strand of these genes in RNA-seq results.

<sup>g</sup> A series of transcript was detected across multiple annotated genes.

<sup>h</sup> Prediction as an effector protein with EffectorP 1.0 was lost in the calibrated cDNA sequences of these 6 genes.

n.d., not detected

n.a., not applicable

**Supplementary Table S4. Primers used in this study**

| Gene       | Primer sequence                                      | Gene       | Primer sequence                                    |
|------------|------------------------------------------------------|------------|----------------------------------------------------|
| AG1A_00157 | CCCATGCTCACTTGGCTTC<br>CCCTTACTTCGTATCATACTACC       | AG1A_07122 | TCTCTAGTCAGCCGCCATC<br>GATTGTCTCTGGTTTCGAGGTC      |
| AG1A_00273 | CCGCAATGCAAGTCAAAGG<br>GCAAAGGGACGAAGGTGTG           | AG1A_07262 | TTGATCTTGTGCTCGCCATC<br>CTTTCCTCCGCCATTACACC       |
| AG1A_00431 | GGGATCGACTGGGATAAAAGTG<br>ATCGCACCTTGCCGTTG          | AG1A_07267 | GTCGACTGGCTCACACCTTC<br>ACGCACTAAACAGCGCAAAC       |
| AG1A_00478 | GGGTTGACGAGTTTGCTTCC<br>TAATAGCGTGGTCCGTTCTTCC       | AG1A_07958 | GCGATCAATATCAACGACCAAG<br>TGAGAGGGAGTATGACGGAGTG   |
| AG1A_00669 | TGTTCTCTTCGCTGTATCGTTTG<br>ACGACGGATTGGAGACTTGG      | AG1A_07966 | GATCCATGCTATGCCAGTACCTC<br>GTCGCCATCCACAACCATC     |
| AG1A_00684 | GGCAAGTTCCAAGGGAGTG<br>AAATCCAACGACCGGAGAAG          | AG1A_08025 | GACTCTTGCAACCACAGTCTCC<br>TTCTCTGCCTTTCGTATCC      |
| AG1A_00763 | TGGGAGAAAGGGACAGCAAAG<br>ACAGTGATTGCTCGTTCCG         | AG1A_08061 | GGTCGCAGTTTCATCATCTCC<br>TTGCGGCCAATCCAAAG         |
| AG1A_00879 | TGACTGAGATGGAGGAATCACAC<br>TTCCTGGTAGCCTGTAATCGTAATC | AG1A_08487 | CACGTTTTCAATAACAGGGAAGG<br>TAAACCGACGAGCGGAAAAG    |
| AG1A_00951 | GGCCGATGTCGAGAAGTTG<br>TACACCGCGAGGGTCTTTG           | AG1A_08488 | CTTTGTTGAGTTCCTATTTTCC<br>AGCCCTTATACTGCCGATG      |
| AG1A_01042 | CATCTGGGATTGACGCTTATGTC<br>TTCCTGCTGCCGATTTC         | AG1A_08577 | CTTGCTTGTGCCTAATCCGACTG<br>TTGACGGGGTGGCTTG        |
| AG1A_01512 | GGCCTCAGGAAGACACAAGG<br>TGGAAGGGATAGGTGGGAAAC        | AG1A_08615 | CCCTTTGTAATCAACGTCTTGG<br>CTACTGCCTCCTTGTTCATCTGG  |
| AG1A_01603 | CTAAATTGGTTGTTGCTG<br>CGCTCTCGTGTATCGCAATTAC         | AG1A_08650 | TTTACGACCAACCCGCCTAC<br>CCTGGTTAAGTCCAGCCAACTC     |
| AG1A_01604 | CGAAGGCAGATGCGATAAC<br>TCATAGTCCGAAGTCCAAAGTCC       | AG1A_08777 | CCAAGGAATCAGGAGGAAAGTG<br>TCCAAAAGGGTCCGTGTAATG    |
| AG1A_01605 | CGCTTCGCTTATTGATTGCTC<br>GGGTCGGTTGTGCGCTTAC         | AG1A_09055 | TGCGAATGTAGTCGCTCAC<br>TAAACCCGCCAACCAAACTC        |
| AG1A_01933 | AGGCACCGCTAATTGTTG<br>CCAGACGATCCCAAATCAACTC         | AG1A_09060 | CGCCTGTCCATTACCATC<br>CCAAATACGACCAAGCTTCC         |
| AG1A_02940 | AACACATCGCTCTTGGATATGG<br>TTCTGGGTCGGTTTTGGTG        | AG1A_09202 | AGGCTTTCTGCTCGCCTTC<br>GTTGTCCACTCCCTCCACTACC      |
| AG1A_03047 | GACCATTTCCAAGACGACCAAG<br>GGGAATCGGGATAATGCAAG       | AG1A_09203 | GCCTTTGCTTCCCCTCTTG<br>GTAAGATTGCATTGGCCCTTCC      |
| AG1A_03254 | GAAAGGCACGGATAGGAAAGG<br>GCCGAGTACGGTAACAAAAGG       | AG1A_09207 | GTGGAATGCGCGTGTACTG<br>CGTATTTCCGCCCTTCTTG         |
| AG1A_04006 | TTGCTCCGGCTTGTTCG<br>ACACGGGGTGAAGAGACAGG            | AG1A_09229 | GGCTCCACCCAGAGCATAAATAC<br>CGCATTACCTCCTCGCCTAC    |
| AG1A_04237 | GCCCCAGTATCTCTGTTTTGTTG<br>CACAAATGACCTCCAAATCTTCC   | AG1A_09643 | TTTTGTGATTCTGGCTGTTGAG<br>CAGACCGCACAGGTCCTAAC     |
| AG1A_04298 | GTCGTAGACAGATCAGAACACCAAC<br>CGAAATAACACTCCCACCAAG   | AG1A_09728 | TGGCCGGACCAACAATAAG<br>CGAGAAAGCGTCATAGAAACAATC    |
| AG1A_04737 | AGCGTGGTGAAGCGAATG<br>CAGACGGATGGCTGTAACGTAG         | AG1A_09837 | AAGGTGGTGGGCGAGTAACG<br>GGATGAACAACACCTGATCC       |
| AG1A_04814 | CATAGGAAACGCTCGGCAAC<br>TGCCACTGATGAGACGGTAGAG       | AG1A_09956 | TAGCAGAGATTGCTGCACAAGAG<br>ACGGCAACTCCTGTATCTTC    |
| AG1A_04819 | CCGTCAAGTTTGTGTAATCACTATG<br>AGATGTGATTGTGGTGGTTGATG | AG1A_10146 | TTTCGTCGCTGCCCAAG<br>CCTGGAAGAGGTGAGCCAAG          |
| AG1A_05291 | GCGCGGCTGTTTTCTTG<br>GACACGAGAGTTGGCAATG             | AG1A_10284 | ATCCGCCACCTCTGTTAGC<br>CAGGTGCTGGCCATACAAC         |
| AG1A_05500 | GGACTGCTGCATTAAGGTTGG<br>GCACGATGGCTGTTGTAAG         | AG1A_10478 | CGACTCCCTTGCTATTTCTTG<br>CAAGTTTCTCCACTCCCTACGAAC  |
| AG1A_05783 | CCGAGCCGAGAAGATCAAG<br>AGTTATTGGTCAAGTCAGGGAAG       | 18S rRNA   | AATCCAGCTCCAATAGCGT<br>TACATACCGTGAGCGAGACC        |
| AG1A_05938 | CAAGAGCAAACGACCGATG<br>GCCAAGTCCAACAGCAAG            |            |                                                    |
| AG1A_06169 | GACAATCAGGACGACAACGAG<br>ATTGCAGACTTTAGCGAACCAAG     | AG1A_05310 | CAACAAGAAAAGTTCCACCGATATG<br>CGACTTTCGGTTCGTTTGTG  |
| AG1A_06325 | GTGTGTTGGTGAAGCGGAAAG<br>GGTCCTGATGCCAATAGTTC        | AG1A_06618 | GCGGGTTAGTTGTTGGTTG<br>GGCTTCATAGCAGGGGAAAAG       |
| AG1A_06613 | TTGTTGCTGGTGTGCTCTTG<br>CTGCCTTTCGTTGATACCC          | AG1A_06890 | ACCAGGACCACGACAAGGAC<br>TGCTATCCGAGTGCCCAAT        |
| AG1A_06710 | GATACGGCTCGAAGCAACTAAG<br>GGTTTTACTCGCCACTGTTTG      | AG1A_07787 | TCCCTTTTCTGTTCACTGATGTTAGG<br>TTATTGGCAGGATCGTTTTG |
| AG1A_06739 | CGCCTCTGGTGGTTCTACTACTC<br>GAAATCCGAAATGATTGCCTTG    | AG1A_07795 | GGATCAACTGGGCAACTCAAC<br>GCAGCTACTACAACATGCACACC   |
| AG1A_07047 | GCGTTGCTATCTGCTTCC<br>GTAGTCTTCCCGTCCCATCC           | AG1A_08771 | AGACCAGTACGCCCTCACCAC<br>CCCGATAAGCAACCAGAACC      |
| AG1A_07075 | CCGATTGCCGTTGGAAG<br>AGTAGAATACACCTGGGCGAAAAC        | AG1A_09161 | GCCCATACGCTCTTCCAAC<br>CACCCAACAGCGACTTCATC        |
